# Supplementary material
Source: Research Square preprint supplement (doi:10.21203/rs.3.rs-9611501/v1)
Supplement: Supplementary file 1 [file 8f8d9c412e4bef260ef16075.docx]

**SUPPLEMENTARY: UNCROPPED IMAGES**


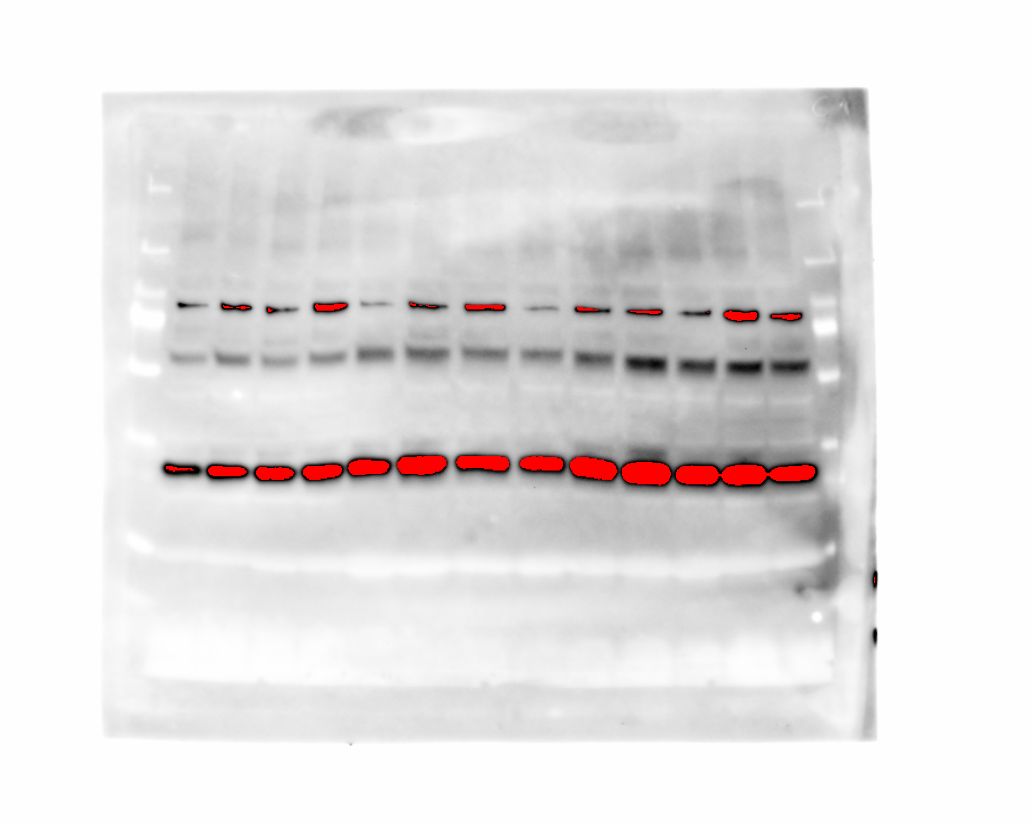
**AMPK**


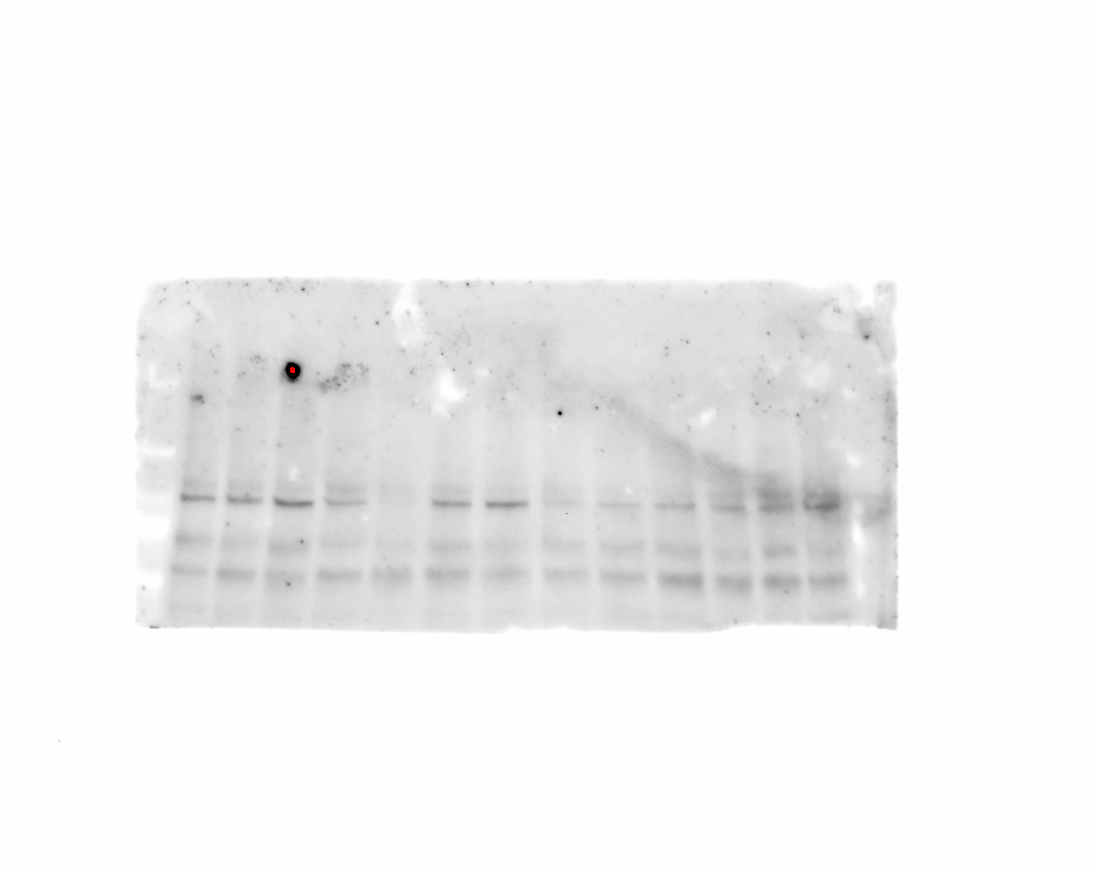
**PGC-1α**

**NRF1**


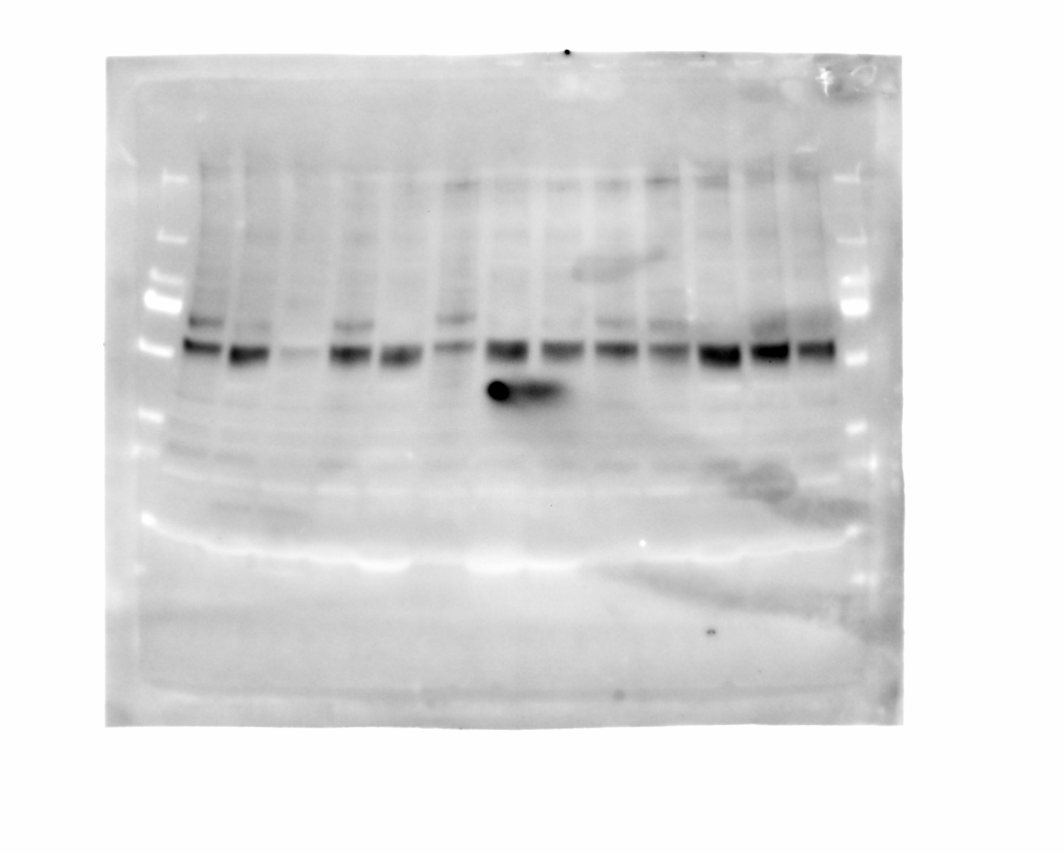


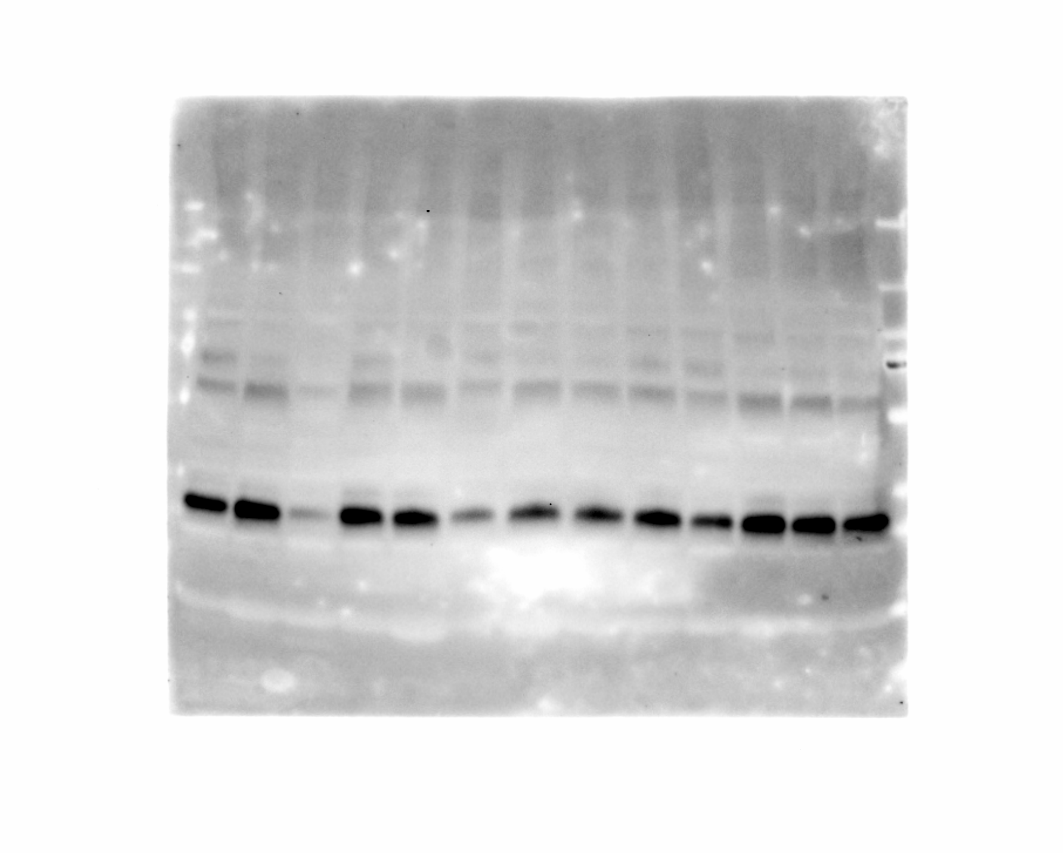
**NRF2**


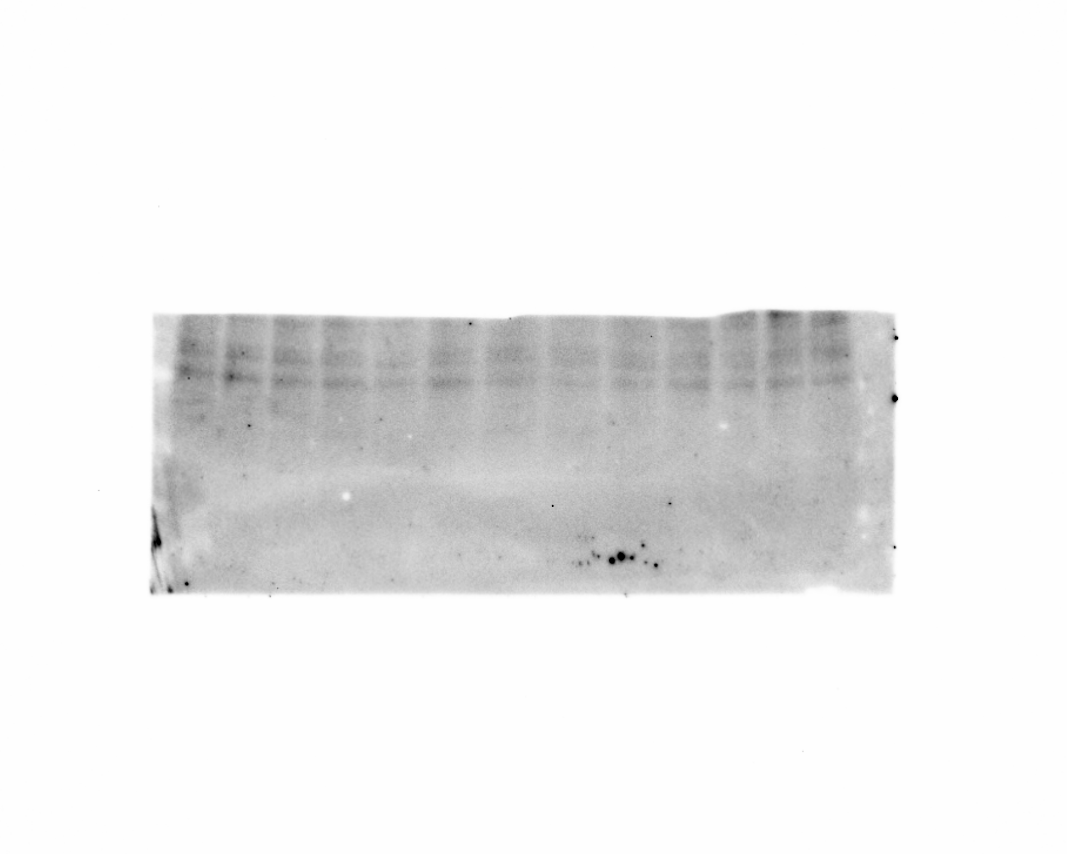
**TFAM**

**OXPHOS-V**


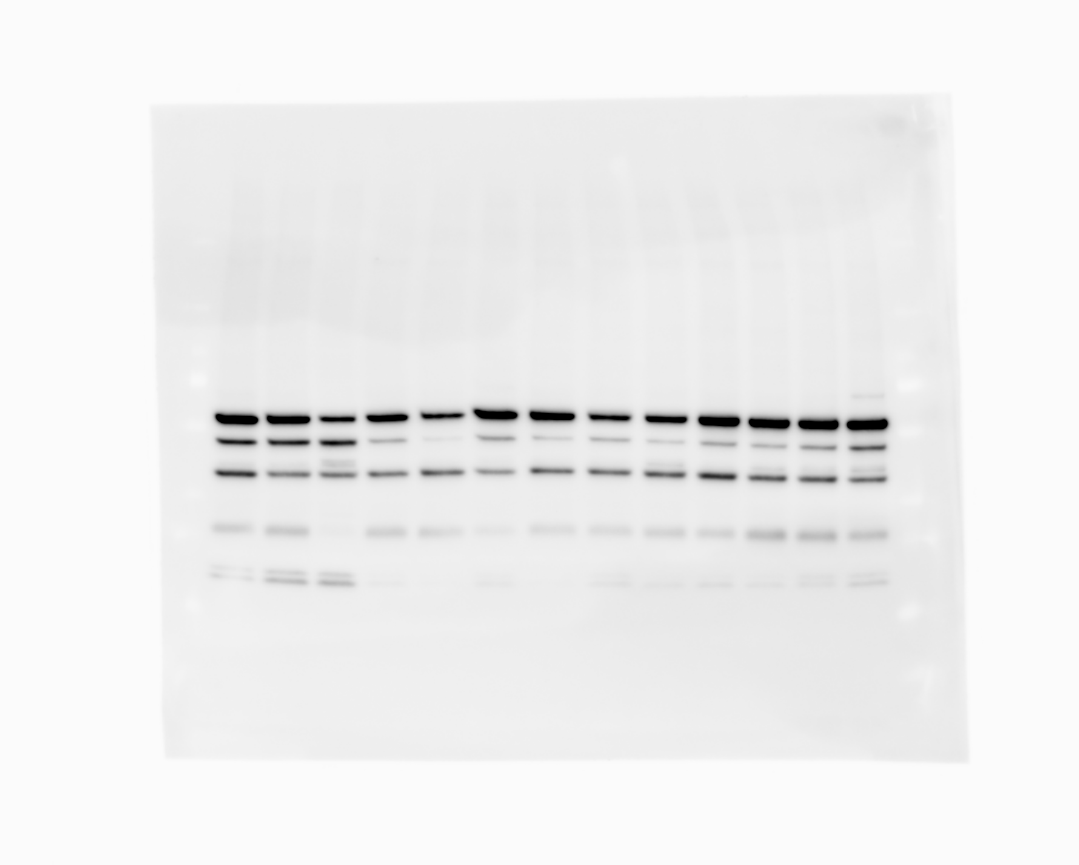


**OXPHOS-II and OXPHOS-III**

**
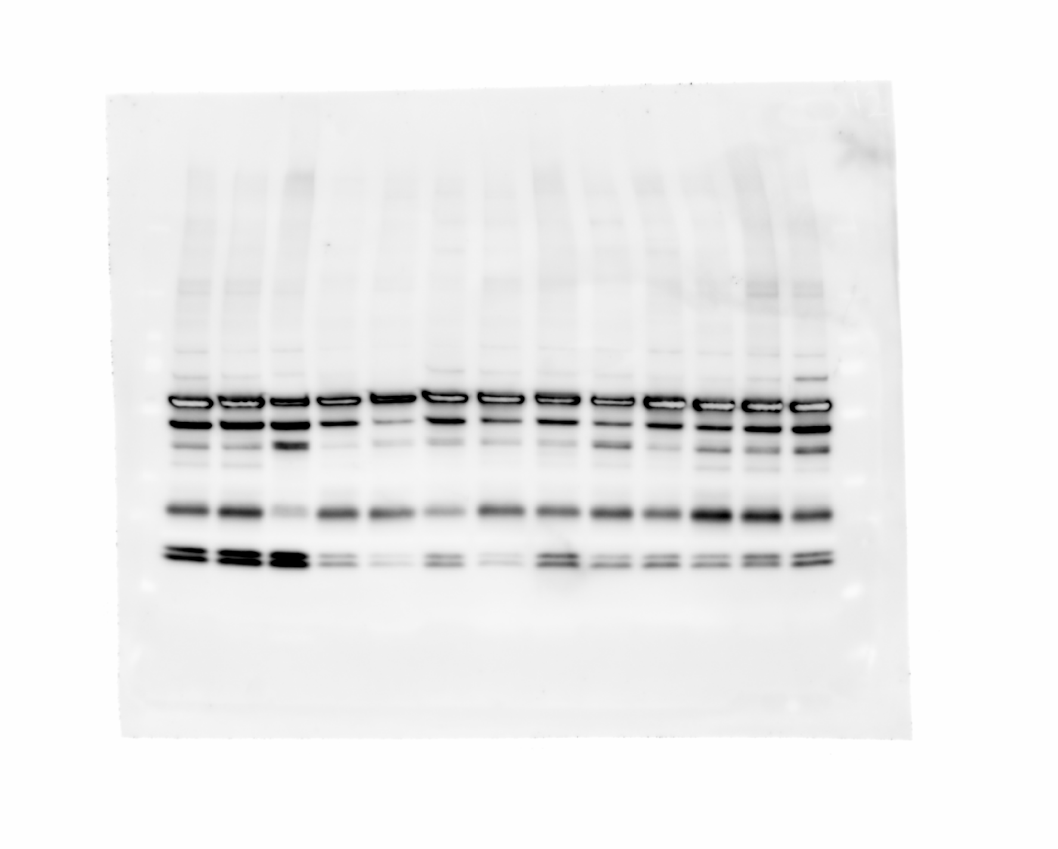
**

**OXPHOS-I and OXPHOS-IV**


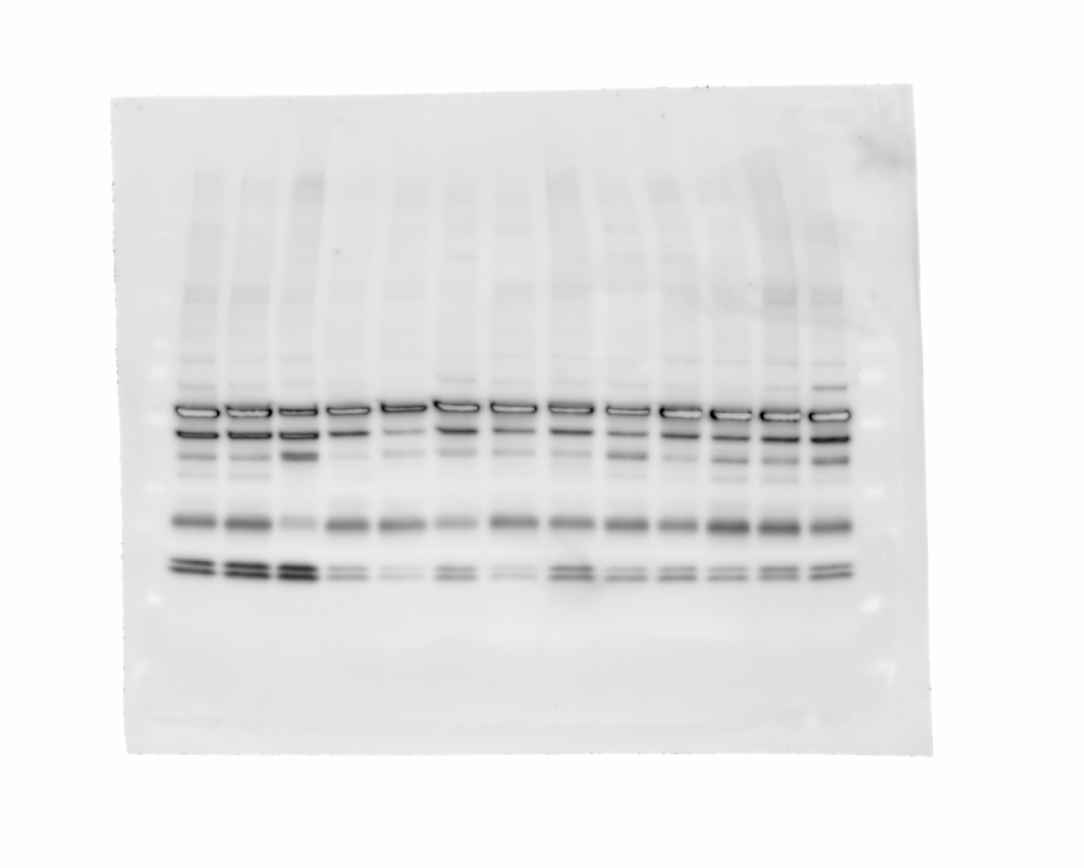


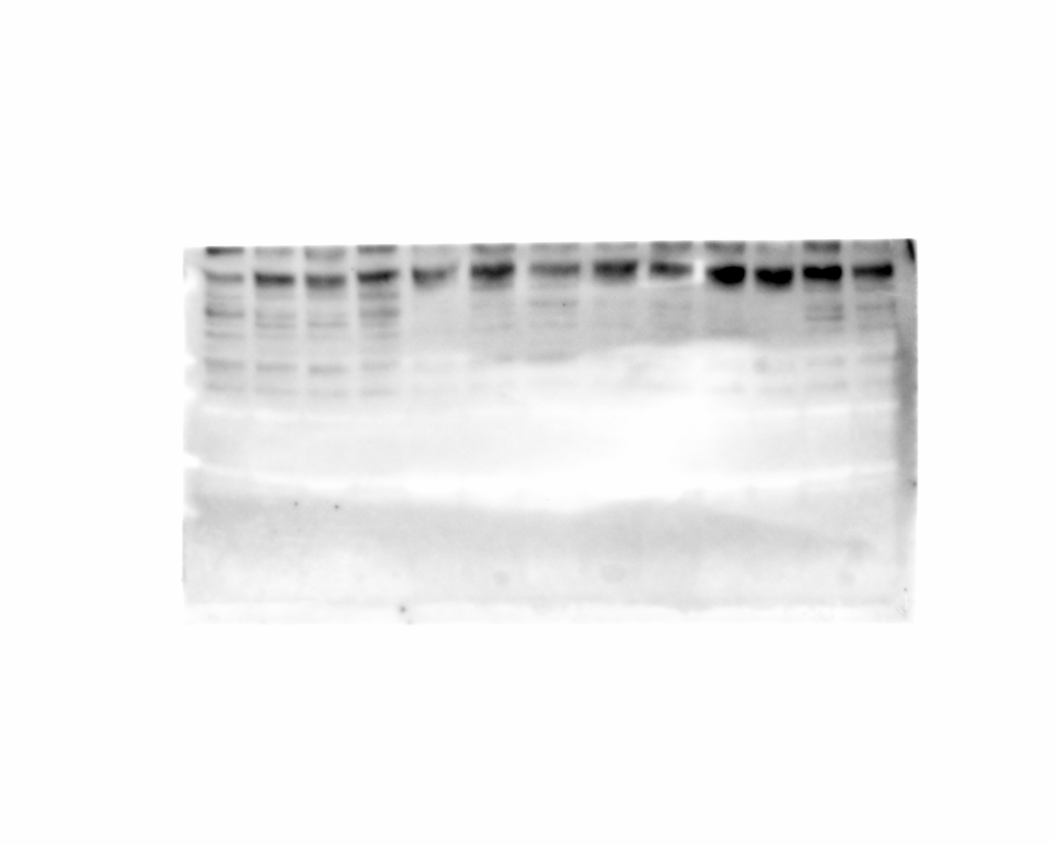
**PPAR-γ**

**SIRT1**


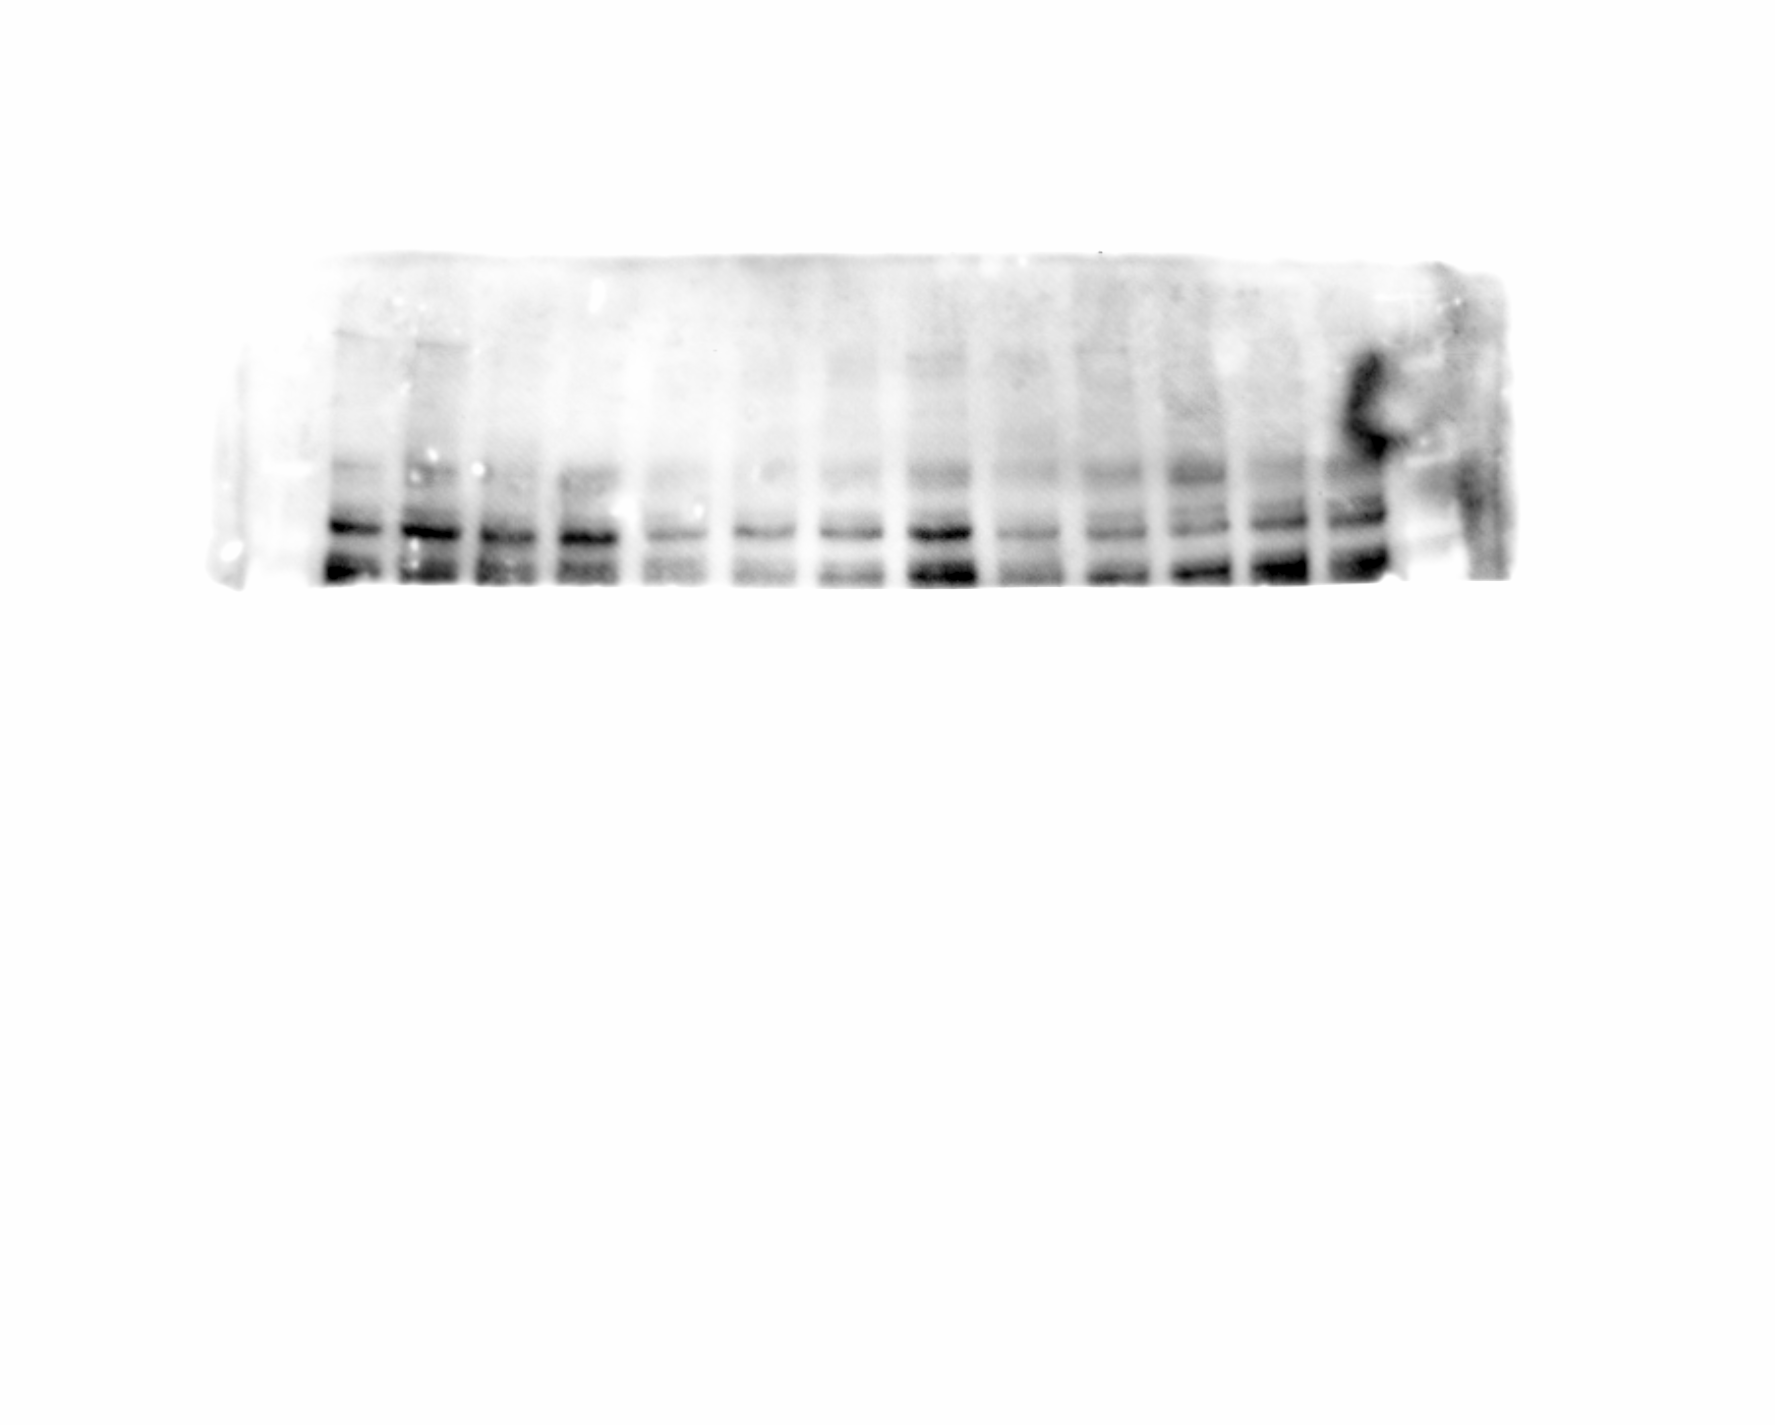


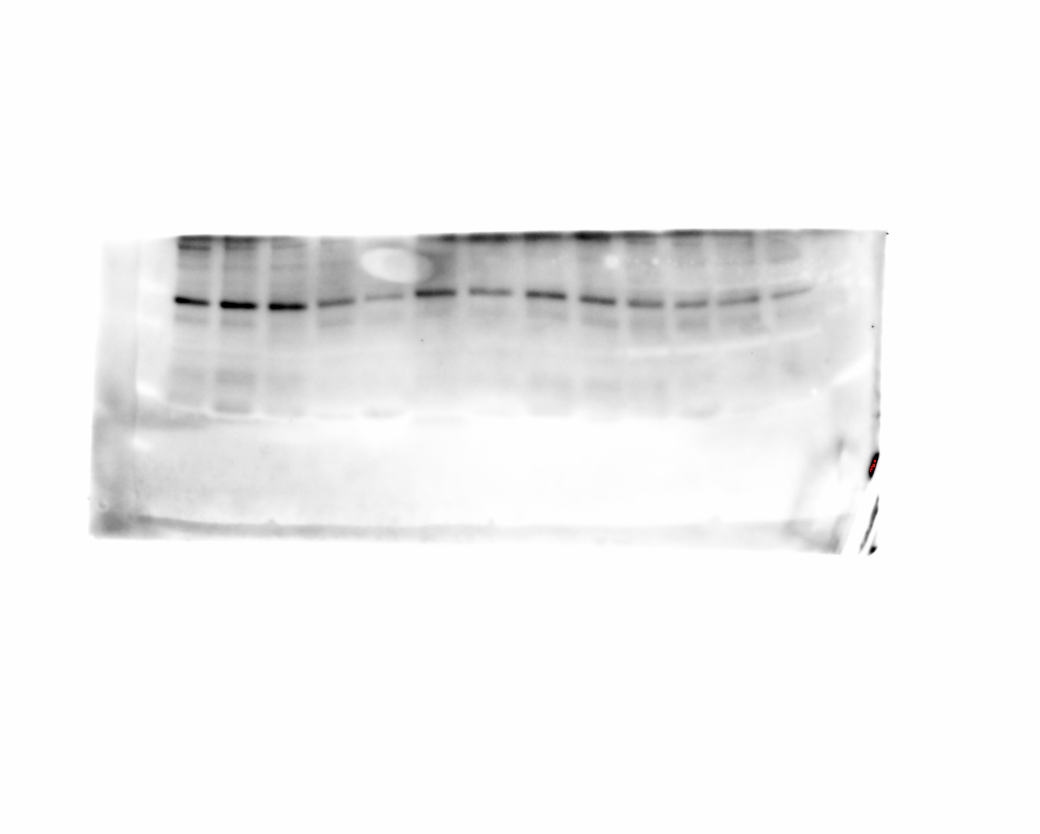
**SIRT3**

**PRDX3**


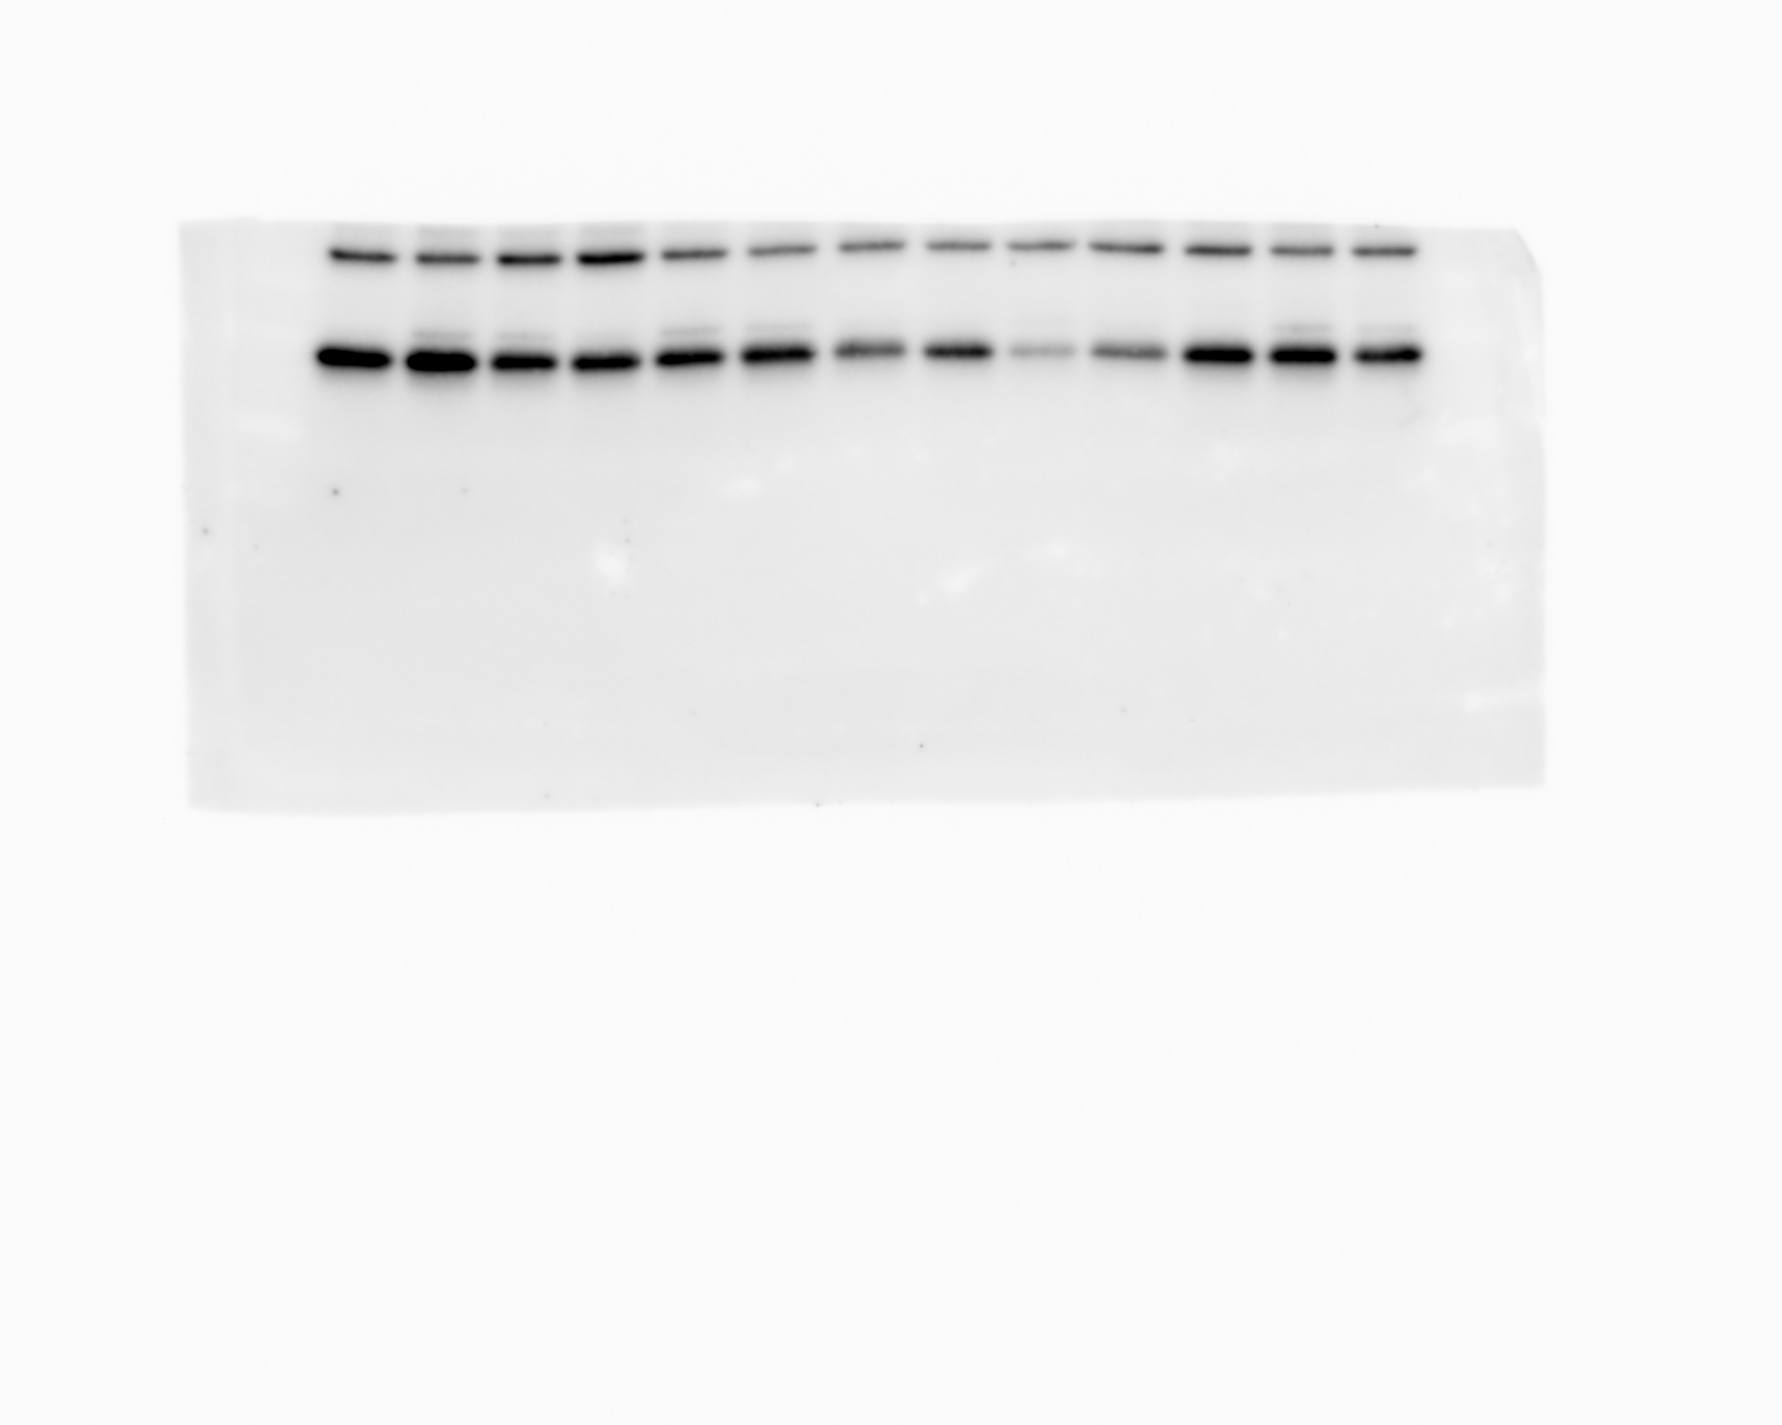


**GAPDHs**

**
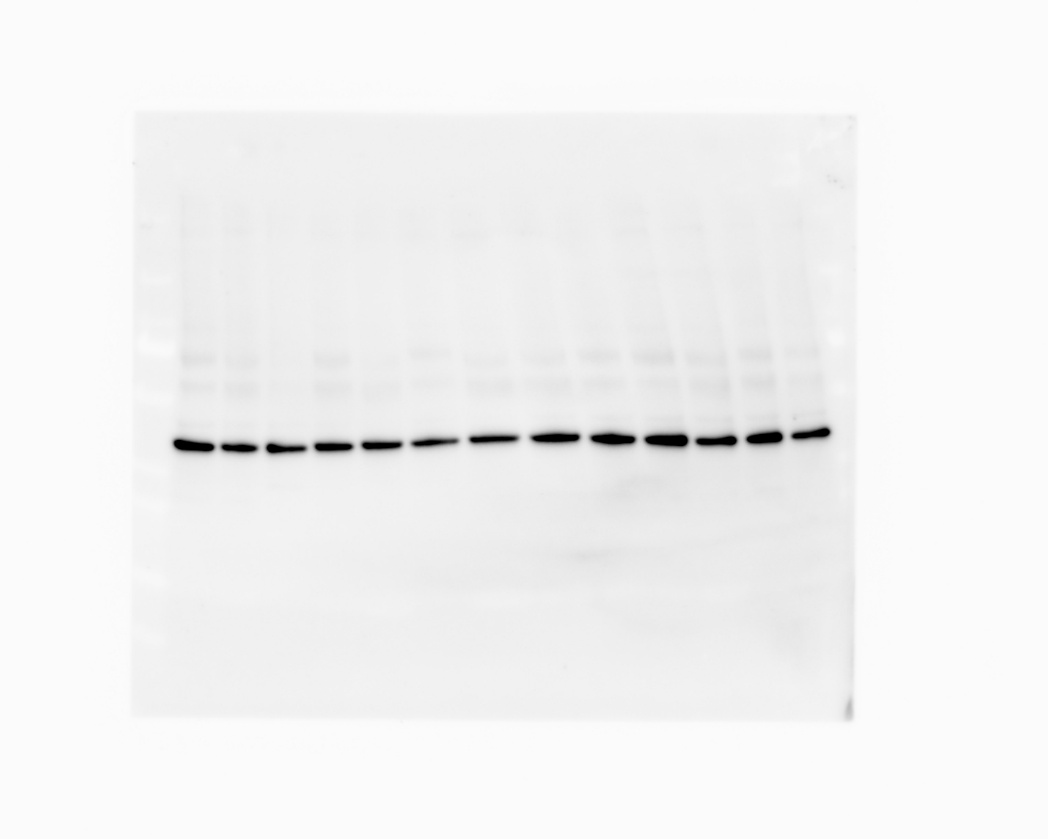
**

**
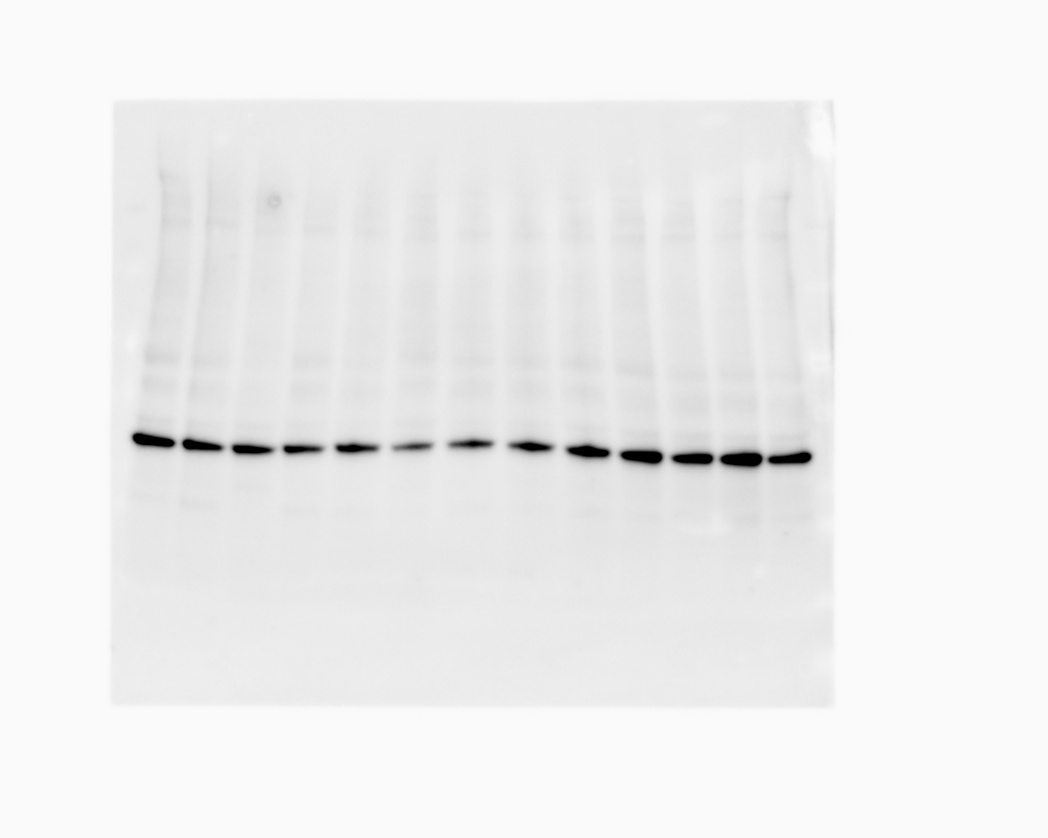
**

**
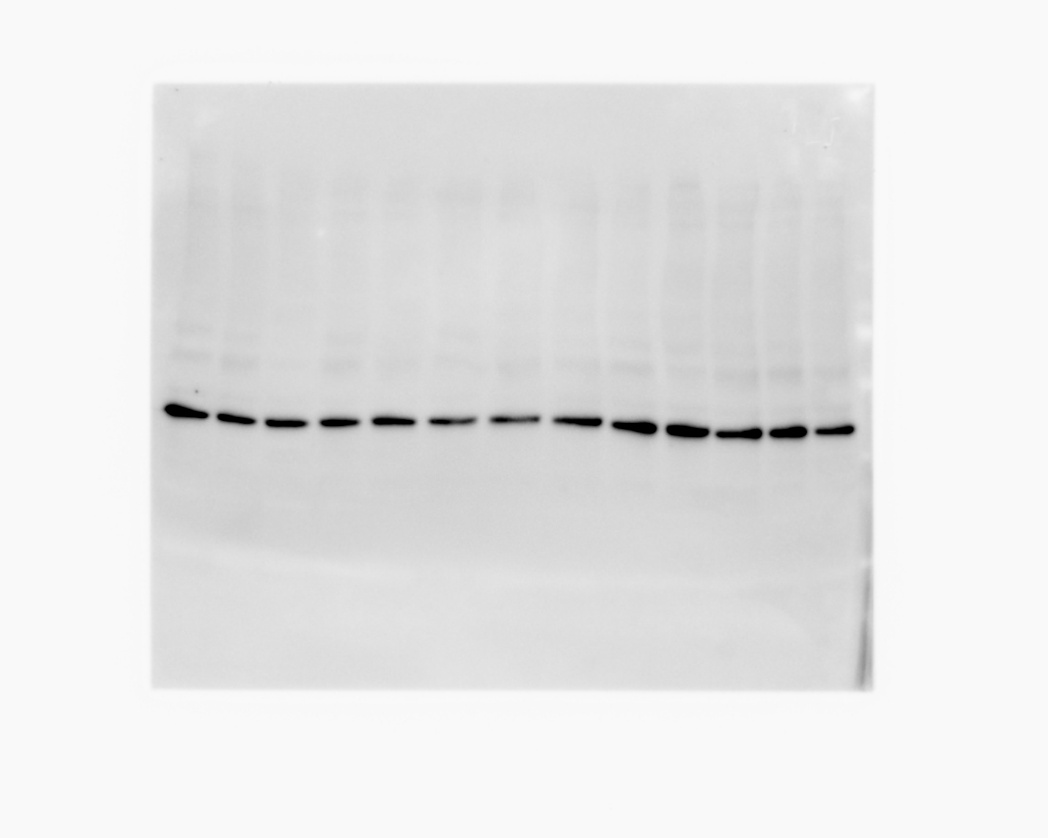
**

**
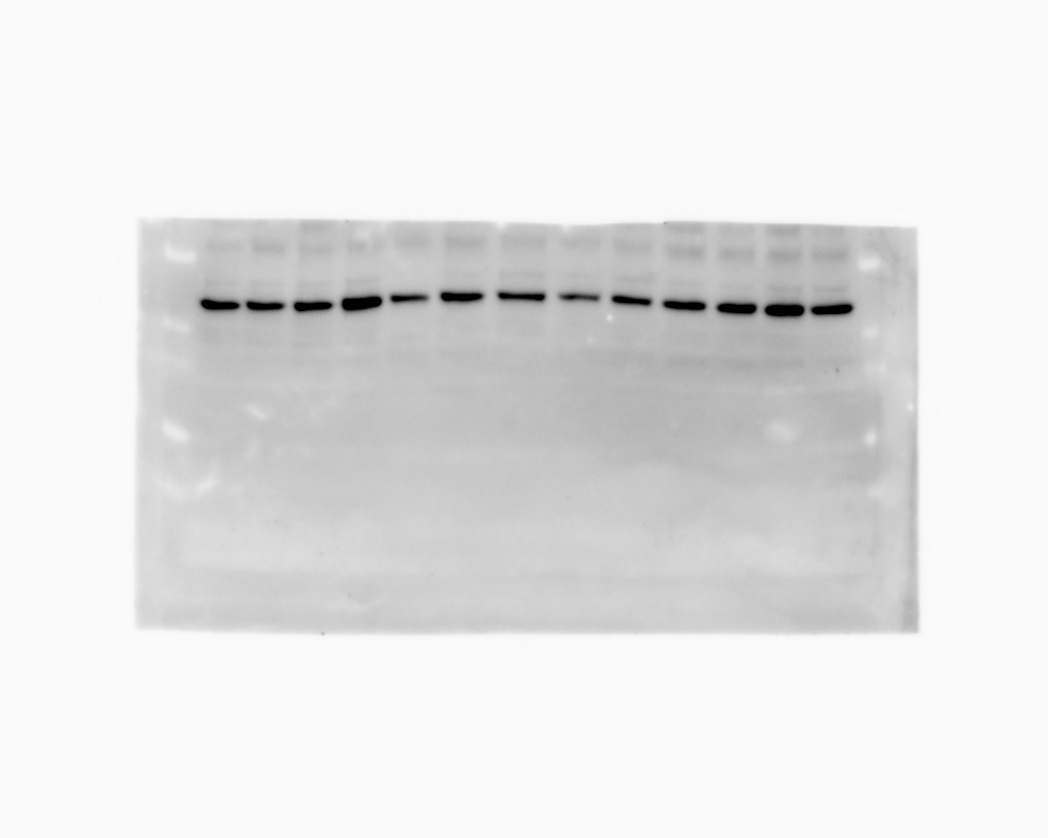
**

**
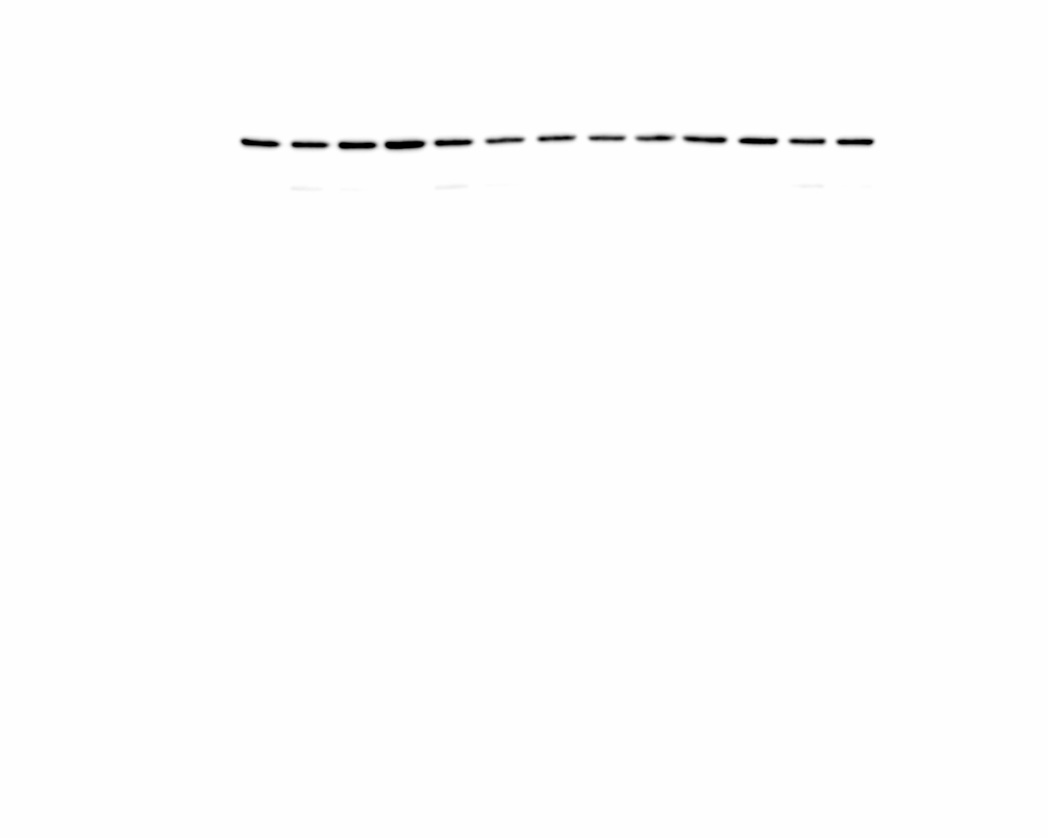
**

**
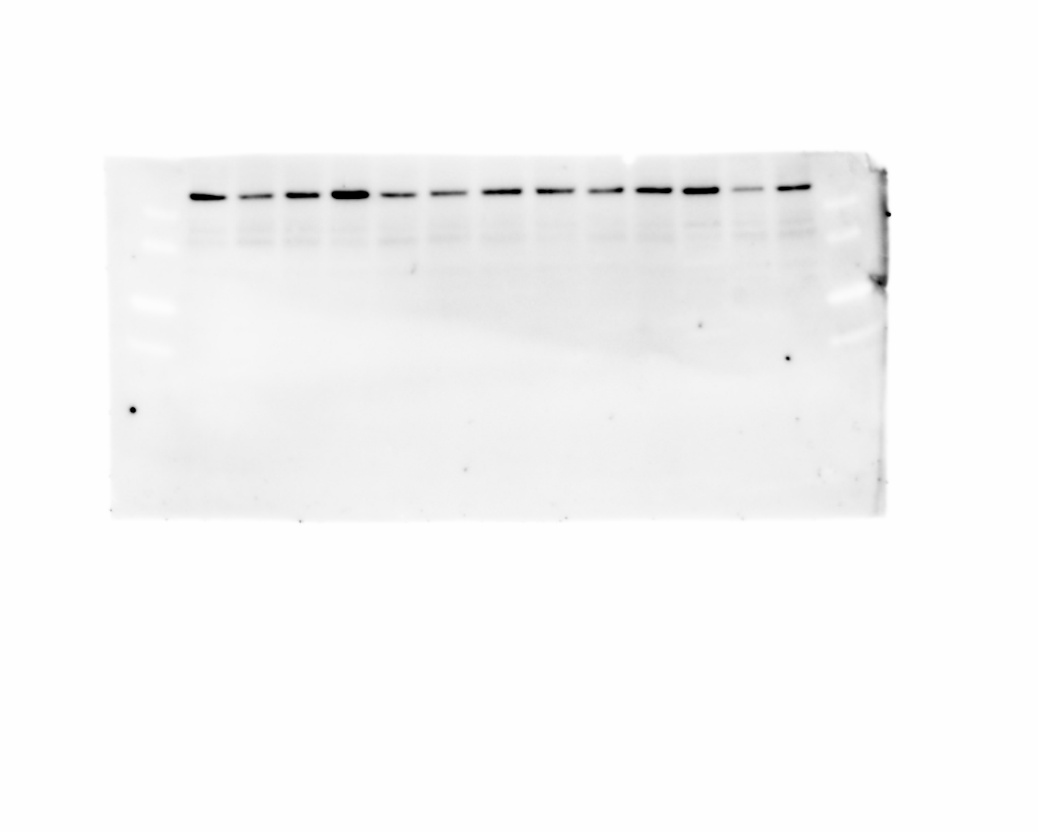
**

**
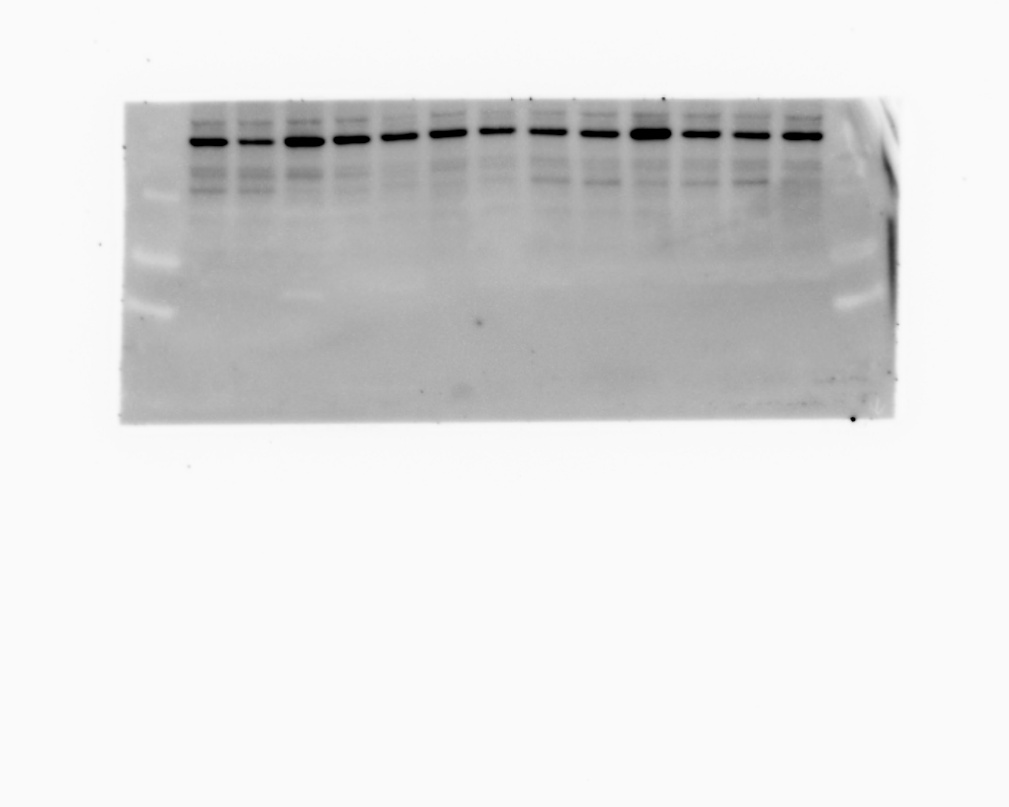
**
